# Supplementary material for: Montmorillonite for Adsorption and Catalytic Elimination of Pollutants from Wastewater: A State-of-the-Arts Review
Source: MDPI journal article supplement (doi:10.3390/su142416441), 2022-12-08
Supplement: s1 [file s1]

# Montmorillonite for Adsorption and Catalytic Elimination of Pollutants from Wastewater: A State-of-the-Arts Review

Zakariyya Uba Zango <sup>1,2,\*</sup>, Abdurrahman Garba <sup>1</sup>, Zaharaddeen Nasiru Garba <sup>3</sup>,  
Muttaqa Uba Zango <sup>4</sup>, Fahad Usman <sup>2</sup> and Jun-Wei Lim <sup>5,6,\*</sup>

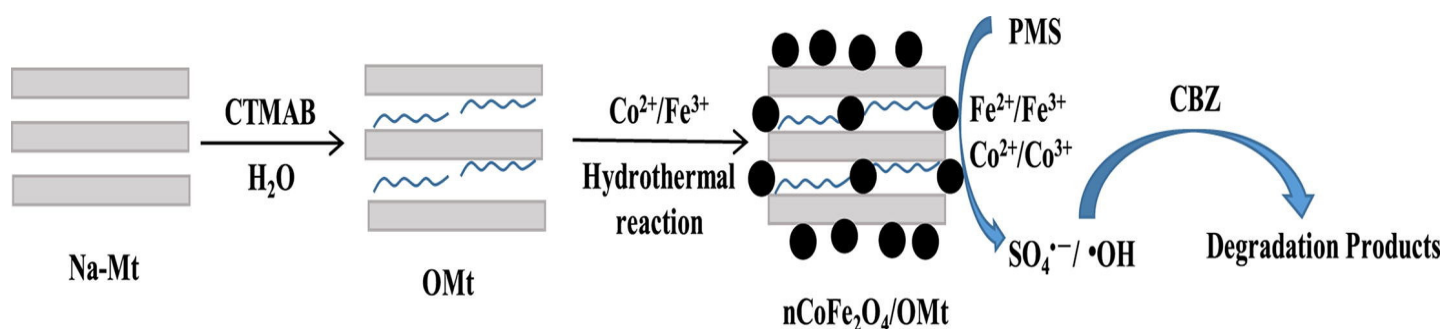

**Figure S1.** Synthesis of nCoFe<sub>2</sub>O<sub>4</sub>/MMT composite and its mechanism for carbamazepine (CBZ) photocatalytic degradation [1].

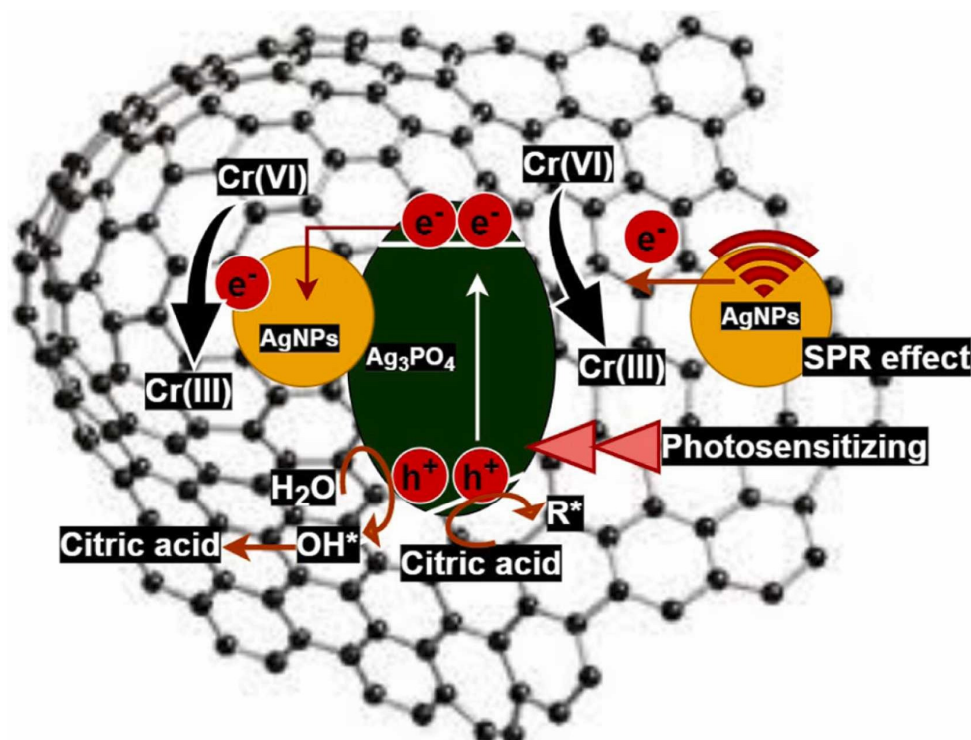

**Figure S2.** Mechanism for Cr (VI) photocatalytic degradation by MMT-Ag<sub>3</sub>PO<sub>4</sub> composites [2].

**Table S1.** Compilation of various MMT composites as photocatalyst for dyes degradation.

| Adsorbent                      | Pollutant | Photocatalytic parameters |                      |               |                  | Remark                                                                                                                                                       | Ref |
|--------------------------------|-----------|---------------------------|----------------------|---------------|------------------|--------------------------------------------------------------------------------------------------------------------------------------------------------------|-----|
|                                |           | Catalyst weight (mg)      | Concentration (mg/L) | Light source  | Irradiation time |                                                                                                                                                              |     |
| MoS <sub>2</sub> -MMT          | MO        | 10                        | 20                   | Visible light | 90 min           | The MoS <sub>2</sub> is the driving for the photocatalytic degradation, while the MMT nanosheet provided the abundant adsorption sites for the dye molecules | [3] |
| BiOCl-MMT                      | RhB<br>OG | 15                        | 40                   | Mercury lamp  | 60 min           | The catalyst inhibits charge recombination and exhibits higher degradation efficiency of the dyes due to the good photocurrent intensity of BiOCl.           | [4] |
| Fe-MMT                         | CV        | 150                       | 60                   | Solar lamp    | 240 min          | Fe <sup>3+</sup> helps on the generation of OH· radicals while the MMT adsorbed the dye for faster degradation.                                              | [5] |
| Fe/Cu-MMT                      | RhB       | 150                       | 100                  | Visible light | 90 min           | MMT provides more adsorption sites on the surface of the catalyst which improved OH radical production by the H <sub>2</sub> O <sub>2</sub>                  | [6] |
| MnO <sub>2</sub> nanosheet@MMT | MB        | 150                       | 50                   | Visible light | 60 min           | MMT adsorbed the dye, while the MnO <sub>2</sub> produces free radicals that attack the dye for the photocatalytic degradation.                              | [7] |

|                                              |                |      |      |                      |         |                                                                                                                                                              |      |
|----------------------------------------------|----------------|------|------|----------------------|---------|--------------------------------------------------------------------------------------------------------------------------------------------------------------|------|
| K10-APTES-3Gly-Fe MMT                        | CR<br>MO<br>MB | 66   | 24.5 | UV pen lamp          | 60 min  | Rapid decomposition of the dyes was achieved, with CR having the least degradation due to its higher molecular weight.                                       | [8]  |
| BiOBr/MMT                                    | RhB            | 50   | 40   | Xenon lamp           | 120 min | The contact between BiOBr and Na-MMT resulted in lower photoelectrons recombination and good photocatalytic activity of the catalyst.                        | [9]  |
| ZnO/MMT                                      | DR54           | 62.5 | 40   | UV light             | 60 min  | ZnO immobilization on MMT leads to increase in surface area of the catalyst which resulted in more generation of $h^+$ that attack the dye.                  | [10] |
| Bi-doped TiO <sub>2</sub> /MMT               | RhB            | 50   | 10   | Iodine tungsten lamp | 210 min | MMT improved the adsorption of photons and RhB molecules onto the composite, achieving the degradation efficiency of 90.60%.                                 | [11] |
| Cu/Pd-Ti-MMT                                 | MB             | 6    | 200  | Visible light        | 20 min  | The catalytic degradation was aided by the Cu and Pd, and better efficiency was achieved at higher catalyst dosage.                                          | [12] |
| Ag loaded B <sub>2</sub> O <sub>3</sub> /MMT | RhB            | 100  | 10   | Visible light        | 240 min | Increasing the catalyst dosage improve the photocatalytic activity due to accessibility of more active sites, achieving over 90% degradation within 60 mins. | [13] |
| TiO <sub>2</sub> -MMT                        | BB3            | 100  | 10   | Ultrasonic power     | 90 min  | TiO <sub>2</sub> negatively charged surface promotes radicals' production which attack the cationic dye.                                                     | [14] |

|                                       |      |     |    |               |         |                                                                                                                                              |      |
|---------------------------------------|------|-----|----|---------------|---------|----------------------------------------------------------------------------------------------------------------------------------------------|------|
| TiO <sub>2</sub> -MMT                 | RhB  | 150 | 10 | Xenon lamp    | 120 min | MMT negatively charged surface acted as a carrier for transporting the photogenerated electron.                                              | [15] |
| G-Fe-MMT                              | RB19 | 400 | 75 | UV light      | 100 min | The catalyst exhibited higher solar absorption and generated more OH· radicals for the degradation of the dye.                               | [16] |
| γ-Fe <sub>2</sub> O <sub>3</sub> /MMT | RhB  | -   | 10 | Xenon lamp    | 60 min  | Degradation efficiency of 96% was achieved, attributed to the higher adsorption capacity of the dye by the MMT.                              | [17] |
| Ni-TiO <sub>2</sub> /CMMT             | RO84 | 300 | 30 | Tungsten lamp | 120     | TiO <sub>2</sub> -Ni significantly reduced the bandgap of the catalyst and activated the visible light irradiation.                          | [18] |
| ZnO/MMT                               | MB   | 500 | 60 | UV lamp       | 190 min | The ZnO/MMT achieved lower bandgap of 3.20 eV, thus achieved complete degradation of MB within 120 min.                                      | [19] |
| MMT@MoS <sub>2</sub> /CdS             | RhB  | 100 | 20 | Xenon lamp    | 45 min  | MMT is the key. Factor for the adsorption of the dye while the MoS <sub>2</sub> /CdS generates the electrons and holes for photodegradation. | [20] |

**Table S2.** Compilation of various MMT composites as photocatalyst for pharmaceuticals and phenols degradation.

| Catalyst                                     | Pollutant | Photocatalytic parameters |                      |                      |                  | Remark                                                                                                                                                             | Ref  |
|----------------------------------------------|-----------|---------------------------|----------------------|----------------------|------------------|--------------------------------------------------------------------------------------------------------------------------------------------------------------------|------|
|                                              |           | Catalyst weight (mg)      | Concentration (mg/L) | Light source         | Irradiation time |                                                                                                                                                                    |      |
| Ag loaded B <sub>2</sub> O <sub>3</sub> /MMT | TC        | 100                       | 20                   | Visible light        | 240 min          | The photodegradation of RhB was favoured at lower of pH of 3 – 5, achieving 90 degradations within 60 mins.                                                        | [13] |
| MCC-MT-MB                                    | TC        | 10                        | 50                   | Red light            | 60 min           | Degradation efficiency of TC increased with MB dosage due to the production of MB* species which activate the photocatalyst.                                       | [21] |
| Fe <sup>3+</sup> -MMT                        | 2,4-DNP   | 150                       | 2                    | Solar simulator lamp | 350 min          | Replacement reaction takes place between Fe <sup>3+</sup> and Na <sup>+</sup> of the MMT, leading to the generation of more OH radical that attacks the pollutant. | [22] |
| Ti-pillared MMT                              | TMP       | -                         | 25                   | UV light             | 240              | MMT helps in the TiO <sub>2</sub> dispersion in the pillar, while Cr <sup>3+</sup> and Fe <sup>3+</sup> lowered the bandgap of the catalyst.                       | [23] |
| Fe <sub>2</sub> O <sub>3</sub> /MMT/PS       | ENR       | 100                       | 30                   | Visible light        | 60               | MMT enhanced the adsorption of the ENR and PS generated the sulfate radicals that attack the pollutant.                                                            | [24] |

|                                        |             |     |     |               |         |                                                                                                                                                                                                    |      |
|----------------------------------------|-------------|-----|-----|---------------|---------|----------------------------------------------------------------------------------------------------------------------------------------------------------------------------------------------------|------|
| nCoFe <sub>2</sub> O <sub>4</sub> -MMT | CBZ         | 400 | 5   | Visible light | 60      | Increasing the dosage of the catalyst resulted in the increased number of active sites and provided more SO <sub>4</sub> <sup>•-</sup> and OH <sup>•</sup> radicals that initiated the degradation | [1]  |
| SWy-2-MMT                              | DNOC<br>PNP | 500 | 200 | Visible light | 60      | The OH <sup>•</sup> generation was induced by the electrolytes while the MMT provided sufficient surface area for the adsorption of the pollutants                                                 | [25] |
| SnO <sub>2</sub> -MMT                  | TMP<br>SMX  | -   | 10  | Solar light   | -       | SnO <sub>2</sub> promoted photoelectrons generation upon exposure to UV light, whereas the MMT provided sufficient sites for trapping the pollutants molecules.                                    | [26] |
| TiCl <sub>4</sub> -MMT                 | 4-NP        | 300 | 15  | UV light      | 220 min | Degradation efficiency of 97% was achieved due to the surface area enhancement and photoelectrons generation upon TiO <sub>2</sub> incorporation into the MMT.                                     | [27] |

## References

1. Wu, J.; Cagnetta, G.; Wang, B.; Cui, Y.; Deng, S.; Wang, Y.; Huang, J.; Yu, G. Efficient degradation of carbamazepine by organo-montmorillonite supported nCoFe<sub>2</sub>O<sub>4</sub>-activated peroxymonosulfate process. *Chem. Eng. J.* **2019**, *368*, 824–836, doi:10.1016/j.cej.2019.02.137.
2. Abderrahim, N.; Djellabi, R.; Amor, H. Ben; Fellah, I.; Giordana, A.; Cerrato, G.; Di Michele, A.; Bianchi, C.L. Sustainable purification of phosphoric acid contaminated with Cr(VI) by Ag/Ag<sub>3</sub>PO<sub>4</sub>coated activated carbon/montmorillonite under UV and solar light: Materials design and photocatalytic mechanism. *J. Environ. Chem. Eng.* **2022**, *10*, doi:10.1016/j.jece.2022.107870.
3. Zhang, J.; Liu, T.; Fu, L.; Ye, G. Synthesis of nanosized ultrathin MoS<sub>2</sub> on montmorillonite nanosheets by CVD method. *Chem. Phys. Lett.* **2021**, *781*, 138972, doi:10.1016/j.cplett.2021.138972.
4. Xu, C.; Gu, F.L.; Wu, H. BiOCl-montmorillonite as a photocatalyst for highly efficient removal of Rhodamine B and Orange G: Importance of the acidity and dissolved oxygen. *Appl. Clay Sci.* **2017**, *147*, 28–35, doi:10.1016/j.clay.2017.07.025.
5. Guz, L.; Curutchet, G.; Sanchez, R.M.T.; Candal, R. Adsorption of crystal violet on montmorillonite (or iron modified montmorillonite) followed by degradation through Fenton or photo-Fenton type reactions. *J. Environ. Chem. Eng.* **2014**, *2*, 2344–2351, doi:10.1016/j.jece.2014.02.007.
6. Zhang, X.; Guo, Y.; Shi, S.; Liu, E.; Li, T.; Wei, S. Efficient and stable iron-copper montmorillonite heterogeneous Fenton catalyst for removing Rhodamine B. *Chem. Phys. Lett.* **2021**, *776*, 138673, doi:10.1016/j.cplett.2021.138673.
7. He, Y.; Jiang, D. Bin; Chen, J.; Jiang, D.Y.; Xin, Y. Synthesis of MnO<sub>2</sub> nanosheets on montmorillonite for oxidative degradation and adsorption of methylene blue. *J. Colloid Interface Sci.* **2018**, *510*, 207–220, doi:10.1016/j.jcis.2017.09.066.
8. Mekidiche, M.; Khaldi, K.; Nacer, A.; Boudjema, S.; Ameer, N.; Lerari-zinai, D.; Bachari, K.; Choukchoubraham, A. Organometallic modified montmorillonite application in the wastewater purification: Pollutant photodegradation and antibacterial efficiencies. *Appl. Surf. Sci.* **2021**, *569*, 151097, doi:10.1016/j.apsusc.2021.151097.
9. Xu, C.; Wu, H.; Gu, F.L. Efficient adsorption and photocatalytic degradation of Rhodamine B under visible light irradiation over BiOBr/montmorillonite composites. *J. Hazard. Mater.* **2014**, *275*, 185–192, doi:10.1016/j.jhazmat.2014.04.064.
10. Khataee, A.; Karaca, S.; Sheydaei, M. Artificial neural network modeling of photocatalytic removal of a disperse dye using synthesized ZnO nanoparticles on montmorillonite. *Spectrochim. Acta Part A Mol. Biomol. Spectrosc.* **2015**, *140*, 465–473, doi:10.1016/j.saa.2014.12.100.
11. Xiang, H.; Tuo, B.; Tian, J.; Hu, K.; Wang, J.; Cheng, J. Preparation and photocatalytic properties of Bi-doped TiO<sub>2</sub> / montmorillonite composite. *Opt. Mater. (Amst.)* **2021**, *117*, 111137, doi:10.1016/j.optmat.2021.111137.
12. Joseph, A.; Vellayan, K.; González, B.; Vicente, M.A.; Gil, A. Effective degradation of methylene blue in aqueous solution using Pd-supported Cu-doped Ti-pillared montmorillonite catalyst. *Appl. Clay Sci.* **2019**, *168*, 7–10, doi:10.1016/j.clay.2018.10.009.
13. Phyu, P.; Wang, J.; Thinn, T.; Wu, X.; Zhang, G. Fabrication of functionalized plasmonic Ag loaded Bi<sub>2</sub>O<sub>3</sub>/montmorillonite nanocomposites for efficient photocatalytic removal of antibiotics and organic dyes. *J. Alloys Compd.* **2020**, *818*, 152836, doi:10.1016/j.jallcom.2019.152836.
14. Khataee, A.; Sheydaei, M.; Hassani, A.; Taseidifar, M.; Karaca, S. Ultrasonics Sonochemistry Sonocatalytic removal of an organic dye using TiO<sub>2</sub>/Montmorillonite nanocomposite. *Ultrason. - Sonochemistry* **2015**, *22*, 404–411, doi:10.1016/j.ultsonch.2014.07.002.

15. Tao, E.; Xiao, X.; Yang, S. A new synthesizing method of TiO<sub>2</sub> with montmorillonite: Effective photoelectron transfer to degrade Rhodamine B. *Sep. Purif. Technol.* **2021**, *258*, 118070, doi:10.1016/j.seppur.2020.118070.
16. Huang, Z.; Wu, P.; Gong, B.; Yang, S.; Li, H.; Zhu, Z.; Cui, L. Preservation of glutamic acid-iron chelate into montmorillonite to efficiently degrade Reactive Blue 19 in a Fenton system under sunlight irradiation at neutral pH. *Appl. Surf. Sci.* **2016**, *370*, 209–217, doi:10.1016/j.apsusc.2016.02.126.
17. Fatimah, I.; Purwiandono, G.; Hidayat, A.; Sagadevan, S.; Kamari, A. Mechanistic insight into the adsorption and photocatalytic activity of a magnetically separable  $\gamma$ -Fe<sub>2</sub>O<sub>3</sub>/Montmorillonite nanocomposite for rhodamine B removal. *Chem. Phys. Lett.* **2022**, *792*, 139410, doi:10.1016/j.cplett.2022.139410.
18. Natsir, M.; Putri, Y.I.; Wibowo, D.; Maulidiyah, M.; Salim, L.O.A.; Azis, T.; Bijang, C.M.; Mustapa, F.; Irwan, I.; Arham, Z.; et al. Effects of Ni–TiO<sub>2</sub> Pillared Clay–Montmorillonite Composites for Photocatalytic Enhancement Against Reactive Orange Under Visible Light. *J. Inorg. Organomet. Polym. Mater.* **2021**, *31*, 3378–3388, doi:10.1007/s10904-021-01980-9.
19. Fatimah, I.; Wang, S.; Wulandari, D. ZnO/montmorillonite for photocatalytic and photochemical degradation of methylene blue. *Appl. Clay Sci.* **2011**, *53*, 553–560, doi:10.1016/j.clay.2011.05.001.
20. Peng, K.; Wang, H.; Li, X.; Wang, J.; Xu, L.; Gao, H.; Niu, M. One-step hydrothermal growth of MoS<sub>2</sub> nanosheets/CdS nanoparticles heterostructures on montmorillonite for enhanced visible light photocatalytic activity. *Appl. Clay Sci.* **2019**, *175*, 86–93, doi:10.1016/j.clay.2019.04.007.
21. Amaly, N.; El-moghazy, A.Y.; Nitin, N.; Sun, G.; Pandey, P.K. Synergistic adsorption-photocatalytic degradation of tetracycline by microcrystalline cellulose composite aerogel doped with montmorillonite hosted methylene blue. *Chem. Eng. J.* **2022**, *430*, 133077, doi:10.1016/j.cej.2021.133077.
22. Peng, A.; Wang, Y.; Yin, L.; Chen, Z.; Gu, C. Halide salts induced the photodegradation of a fat-burning compound 2,4-dinitrophenol by iron-montmorillonite. *Chemosphere* **2022**, *291*, 132694, doi:10.1016/j.chemosphere.2021.132694.
23. González, B.; Trujillano, R.; Vicente, M.A.; Rives, V.; Korili, S.A.; Gil, A. Photocatalytic degradation of trimethoprim on doped Ti-pillared montmorillonite. *Appl. Clay Sci.* **2019**, *167*, 43–49, doi:10.1016/j.clay.2018.10.006.
24. Peng, G.; Li, T.; Ai, B.; Yang, S.; Fu, J.; He, Q.; Yu, G. Highly efficient removal of enrofloxacin by magnetic montmorillonite via adsorption and persulfate oxidation. *Chem. Eng. J.* **2019**, *360*, 1119–1127, doi:10.1016/j.cej.2018.10.190.
25. Ye, P.; Lemley, A.T. Adsorption effect on the degradation of 4,6-o-dinitrocresol and p-nitrophenol in a montmorillonite clay slurry by AFT. *Water Res.* **2009**, *43*, 1303–1312, doi:10.1016/j.watres.2008.12.046.
26. Vidal, C.B.; André, B.; Ronaldo, F.; Bandosz, T.J. Reactive adsorption of pharmaceuticals on tin oxide pillared montmorillonite: Effect of visible light exposure. *Chem. Eng. J.* **2015**, *259*, 865–875, doi:10.1016/j.cej.2014.07.079.
27. Baizig, M.; Khalfallah, S.; Bassem, J.; Batis, N.; Trujillano, R. Preparation and Characterization of Different TiO<sub>2</sub>-Modified Montmorillonite Meso-Microporous Materials, with Enhanced Photocatalytic Activity. *Int. J. Eng. Res. Technol.* ( **2015**, *4*, 182–192.
